# Supplementary material for: Rapid assessment of the quality of Qingkailing products using wooden-tip electrospray ionization mass spectrometry combined with multivariate statistical analysis
Source: Royal Society of Chemistry journal article supplement (doi:10.1039/c5ay00448a), 2015-01-01
Supplement: c5ay00448a1.pdf [file c5ay00448a1.pdf]

# **Rapid assessing the quality of *Qingkailing* products using wooden-tip electrospray ionization mass spectrometry combined with multivariate statistical analysis†**

Qiuling Du,‡<sup>a</sup> Jiewei Deng,‡<sup>b</sup> Yahong Liu,<sup>a</sup> Xiongwei Zhang,<sup>a</sup> Yunyun Yang\*<sup>b</sup>  
and Jianxin Chen\*<sup>a</sup>

*<sup>a</sup>Guangdong Provincial Key Laboratory of Veterinary Pharmaceutics Development and Safety Evaluation, College of Veterinary Medicine, South China Agricultural University, Guangzhou, China. E-mail: jxchen@scau.edu.cn; Fax: +86 20 8528 3730; Tel: +86 20 8528 3730*

*<sup>b</sup>Guangdong Provincial Key Laboratory of Emergency Test for Dangerous Chemicals and Guangdong Provincial Public Laboratory of Analysis and Testing Technology, China National Analytical Center Guangzhou, China. E-mail: yy\_yang@vip.126.com; Fax: +86 20 8768 6511; Tel: +86 20 3765 6885 823*

‡These authors contributed equally to this work.

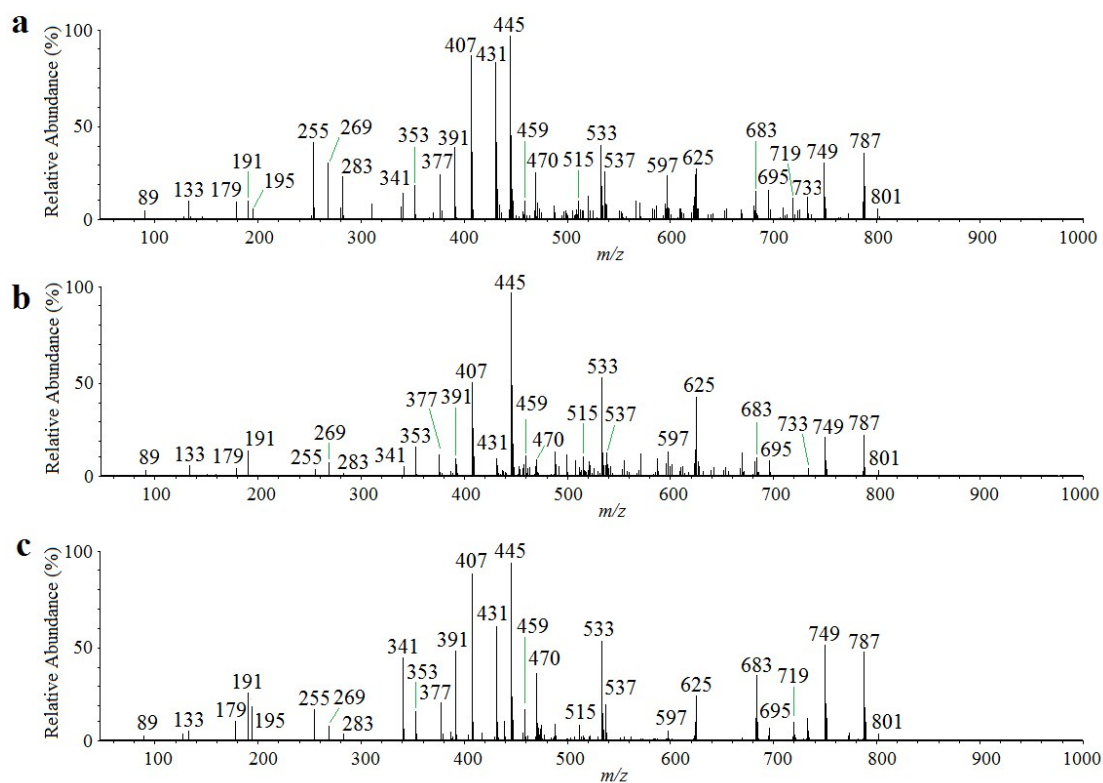

**Fig. S1** Representative mass spectral fingerprints from (a) Baiyunshan *Qingkailing* oral liquid, (b) Shanxitaihang *Qingkailing* oral liquid, and (c) Baiyunshan *Qingkailing* granule.

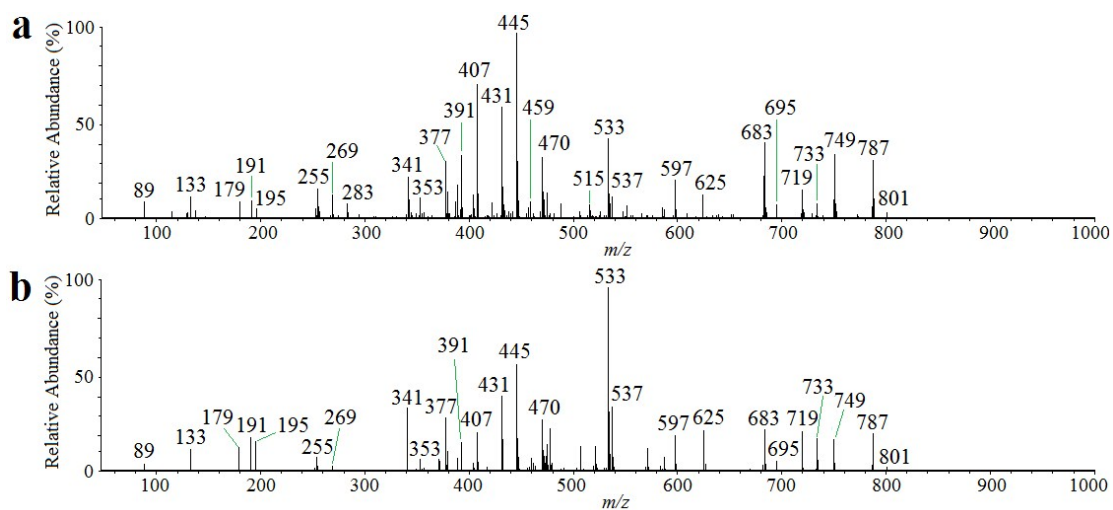

**Fig. S2** Representative mass spectral fingerprints from (a) qualified Baiyunshan *Qingkailing* oral liquid and (b) damaged Baiyunshan *Qingkailing* oral liquid.
